# Supplementary material for: Integrin αV is necessary for gastrulation movements that regulate vertebrate body asymmetry
Source: Oxford University Press journal article supplement (doi:10.1242/dev.045310), 2010-09-16
Supplement: dev045310tables1.pdf [file dev045310tables1.pdf]

**Table S1. Analysis of heart tube location in  $\alpha V$  morphants**

| Morpholino (MO)          | mRNA                 | $n_T$ | $n_{exp}$ | Left       | Right     | Middle    | Absent   |
|--------------------------|----------------------|-------|-----------|------------|-----------|-----------|----------|
| Uninjected               | –                    | 597   | 8         | 85.5±3.0%  | 7.5±2.1%  | 7.0±2.5%  | 1.5±1.5% |
| 2.50 ng control MO       | –                    | 567   | 9         | 83.8±3.8%  | 8.8±2.3%  | 6.9±1.5%  | 0.5±0.4% |
| 2.50 ng $\alpha V1 miss$ | –                    | 118   | 3         | 75.2±12.0% | 7.4±3.1%  | 17.4±9.2% | 0%       |
| None                     | 200 pg $m\alpha V$   | 201   | 5         | 79.2±2.9%  | 6.3±1.1%  | 13.6±2.2% | 0%       |
| 1.25 ng $\alpha V1$      | –                    | 569   | 9         | 47.6±4.0%  | 34.7±5.3% | 15.8±3.0% | 2.1±1.6% |
| 1.25 ng $\alpha V1$      | + 200 pg $m\alpha V$ | 224   | 5         | 63.2±1.9%  | 8.8±4.0%  | 24.6±4.4% | 3.2±2.1% |
| 1.75 ng $\alpha V2$      | –                    | 269   | 7         | 52.2±4.1%  | 19.5±3.3% | 27.8±6.1% | 0.8±0.8% |
| 1.75 ng $\alpha V2$      | + 200 pg $m\alpha V$ | 211   | 3         | 81.9±6.8%  | 3.5±2.0%  | 14.6±4.7% | 0%       |

MOs and mRNAs were injected into 1- to 4-cell-stage wild-type embryos. Location of heart tube was examined with expression of *cmlc2* WISH at 26-28 hpf. Data were expressed as the number of embryos with a specific heart tube location divided by the total number of embryos used per experiment multiplied by 100 (%)  $\pm$  s.e.m.  $n_{exp}$ =number of experimental repeats.  $n_T$ =total number of embryos.
