# Supplementary material for: Integrin αV is necessary for gastrulation movements that regulate vertebrate body asymmetry
Source: Oxford University Press journal article supplement (doi:10.1242/dev.045310), 2010-09-16
Supplement: dev045310tables2.pdf [file dev045310tables2.pdf]

**Table S2. Analysis of asymmetric molecular markers and location of visceral organs in  $\alpha V$  and  $\beta 1b$  morphants**

| Marker      | Location | Morpholino                                      | mRNA               | $n_T$              | $n_{exp}$ | Left       | Right     | Middle/Bilateral | Absent     |          |
|-------------|----------|-------------------------------------------------|--------------------|--------------------|-----------|------------|-----------|------------------|------------|----------|
| <i>spaw</i> | LPM      | Uninjected                                      | –                  | 163                | 4         | 80.9±5.3%  | 8.6±3.9%  | 10.6±3.2%        | 0%         |          |
|             |          | 5.00 ng control MO                              | –                  | 51                 | 2         | 71.7±6.9%  | 13.0±5.9% | 15.3±1.0%        | 0%         |          |
|             |          | 1.50 ng $\alpha V1miss$                         | –                  | 23                 | 2         | 67.8±12.2% | 21.1±1.1% | 11.1±11.1%       | 0%         |          |
|             |          | 1.25 ng $\alpha V1$                             | –                  | 50                 | 3         | 42.7±3.3%  | 42.5±1.0% | 11.8±1.0%        | 3.0±3.0%   |          |
|             |          | 5.00 ng $\alpha VE110$                          | –                  | 156                | 6         | 51.9±3.4%  | 13.4±4.9% | 28.2±2.5%        | 6.5±3.4%   |          |
|             |          | 0.50 ng $\beta 1b1$                             | –                  | 256                | 6         | 71.7±7.0%  | 11.1±2.9% | 13.3±2.9%        | 3.9±2.4%   |          |
|             |          | 5.00 ng $\beta 1bE110$                          | –                  | 118                | 5         | 49.9±8.6%  | 13.4±3.3% | 22.3±5.2%        | 13.7±4.2%  |          |
|             |          | 5.00 ng $\beta 1bE110$ +<br>0.50 ng $\beta 1b1$ | –                  | 96                 | 2         | 37.7±2.0%  | 15.3±8.2% | 31.0±11.9%       | 18.9±4.6%  |          |
| <i>lft2</i> | heart    | Uninjected                                      | –                  | 474                | 6         | 83.7±5.4%  | 3.4±1.8%  | 2.8±1.5%         | 2.8±1.1%   |          |
|             |          | 5.00 ng control MO                              | –                  | 251                | 3         | 76.4±0.3%  | 12.2±4.6% | 6.4±2.9%         | 5.0±5.0%   |          |
|             |          | 1.25 ng $\alpha V1$                             | –                  | 339                | 2         | 34.5±4.2%  | 21.3±1.3% | 17.3±6.1%        | 27.0±11.6% |          |
|             |          | 5.00 ng $\alpha VE110$                          | –                  | 90                 | 2         | 63.2±7.6%  | 18.1±3.5% | 0%               | 18.8±3.5%  |          |
|             |          | 5.00 ng $\beta 1bE110$                          | –                  | 68                 | 2         | 65.7±12.7% | 13.7±9.8% | 2.0±2.0%         | 15.7±7.8%  |          |
| <i>vtn</i>  | liver    | Uninjected                                      | –                  | 499                | 8         | 82.4±2.0%  | 6.9±1.2%  | 10.4±1.9%        | 0.2±0.2%   |          |
|             |          | 2.50 ng control MO                              | –                  | 351                | 5         | 85.9±4.7%  | 11.6±4.5% | 2.1±1.1%         | 0.4±0.3%   |          |
|             |          | None                                            | 200 pg $m\alpha V$ | 122                | 3         | 72.8±3.1%  | 12.8±4.0% | 11.8±4.4%        | 2.6±1.3%   |          |
|             |          | 1.25 ng $\alpha V1$                             | –                  | 616                | 10        | 46.5±3.3%  | 30.5±3.4% | 11.0±2.2%        | 12.0±2.5%  |          |
|             |          | 1.25 ng $\alpha V1$                             | +                  | 200 pg $m\alpha V$ | 211       | 6          | 63.6±6.5% | 18.0±2.1%        | 8.5±3.1%   | 9.9±4.2% |
|             |          | 1.75 ng $\alpha V2$                             | –                  | 84                 | 3         | 45.2±9.3%  | 14.0±7.0% | 0%               | 45.9±4.5%  |          |
|             |          | 1.75 ng $\alpha V2$                             | +                  | 200 pg $m\alpha V$ | 73        | 1          | 61.6%     | 11.0%            | 4.1%       | 23.3%    |
|             |          | 0.70 ng $\beta 1b1$                             | –                  | 182                | 4         | 38.4±11.4% | 14.6±5.7% | 8.2±3.4%         | 38.8±15.6% |          |
|             |          | 5.00 ng $\beta 1bE110$                          | –                  | 64                 | 3         | 55.4±2.9%  | 24.1±8.1% | 0%               | 20.5±10.7% |          |
|             |          | 5.00 ng $\beta 1bE110$ +<br>0.70 ng $\beta 1b1$ | –                  | 53                 | 3         | 1.9±1.9%   | 0%        | 0%               | 98.1±1.9%  |          |
| <i>pdx1</i> | pancreas | Uninjected                                      | –                  | 463                | 7         | 10.8±2.4%  | 85.8±2.2% | 3.2±1.5%         | 0.2±0.2%   |          |
|             |          | 2.50 ng control MO                              | –                  | 351                | 5         | 13.3±4.7%  | 85.6±4.4% | 0.5±0.5%         | 0.6±0.6%   |          |
|             |          | None                                            | 200 pg $m\alpha V$ | 122                | 3         | 16.5±3.9%  | 78.1±2.5% | 3.9±2.9%         | 1.6±1.6%   |          |
|             |          | 1.25 ng $\alpha V1$                             | –                  | 616                | 10        | 35.8±4.4%  | 46.2±4.1% | 6.2±1.8%         | 11.8±2.8%  |          |
|             |          | 1.25 ng $\alpha V1$                             | +                  | 200 pg $m\alpha V$ | 211       | 6          | 23.5±3.2% | 62.9±5.7%        | 9.4±2.0%   | 4.7±2.5% |
|             |          | 1.75 ng $\alpha V2$                             | –                  | 84                 | 3         | 14.1±7.1%  | 55.6±6.9% | 0%               | 30.4±6.4%  |          |
|             |          | 1.75 ng $\alpha V2$                             | +                  | 200 pg $m\alpha V$ | 73        | 1          | 21.9%     | 69.9%            | 2.7%       | 5.5%     |

MOs and mRNAs were injected into 1- to 4-cell-stage wild-type embryos. Location of molecular markers or organ primordia was examined with WISH analysis. Data were expressed as the number of embryos with specific marker/organ location divided by the total number of embryos used per experiment multiplied by 100 (%)  $\pm$  s.e.m.  $n_{exp}$ =number of experimental repeats.  $n_T$ =total number of embryos.
