# Supplementary material for: Integrin αV is necessary for gastrulation movements that regulate vertebrate body asymmetry
Source: Oxford University Press journal article supplement (doi:10.1242/dev.045310), 2010-09-16
Supplement: dev045310tables3.pdf [file dev045310tables3.pdf]

**Table S3. Analysis of heart tube and liver location in DFC-targeted integrin morphants**

| Marker       | Marker location | Injection stage  | Morpholino             | $n_T$ | $n_{exp}$ | Left      | Right     | Middle    | Absent   |
|--------------|-----------------|------------------|------------------------|-------|-----------|-----------|-----------|-----------|----------|
| <i>cmhc2</i> | heart tube      | 512-1000 cell    | 2.50 ng control MO     | 251   | 6         | 87.0±4.5% | 4.0±1.9%  | 8.9±3.1%  | 0%       |
|              |                 |                  | 5.00 ng control MO     | 37    | 2         | 94.4±5.6% | 0%        | 5.6±5.6%  | 0%       |
|              |                 |                  | 1.25 ng $\alpha V1$    | 223   | 8         | 48.2±5.9% | 15.8±3.1% | 33.0±9.1% | 3.0±2.4% |
|              |                 |                  | 5.00 ng $\beta 1bE110$ | 125   | 3         | 56.7±4.3% | 21.6±2.6% | 21.2±6.4% | 0%       |
| <i>cmhc2</i> | heart tube      | Dome-30% epiboly | 1.25 ng $\alpha V1$    | 111   | 2         | 84.5±4.5% | 5.4±0.1%  | 10.1±2.2% | 0%       |
|              |                 |                  | 5.00 ng $\beta 1bE110$ | 147   | 2         | 89.5±3.8% | 2.6±0.2%  | 7.9±4.0%  | 0%       |
| <i>vtn</i>   | liver           | 512-1000 cell    | 2.50 ng control MO     | 242   | 6         | 82.9±4.4% | 10.0±2.6% | 7.2±2.7%  | 0%       |
|              |                 |                  | 1.25 ng $\alpha V1$    | 197   | 3         | 66.4±4.8% | 17.3±2.4% | 15.0±2.9% | 1.3±0.5% |

MOs were injected into yolk cells at indicated stages into wild-type embryos. Location of heart tube or liver was examined with WISH analysis. Data were expressed as the number of embryos with specific marker/organ location divided by the total number of embryos used per experiment multiplied by 100 (%)  $\pm$  s.e.m.  $n_{exp}$ =number of experimental repeats.  $n_T$ =total number of embryos.
