# Supplementary material for: Integrin αV is necessary for gastrulation movements that regulate vertebrate body asymmetry
Source: Oxford University Press journal article supplement (doi:10.1242/dev.045310), 2010-09-16
Supplement: dev045310tables4.pdf [file dev045310tables4.pdf]

**Table S4. Analysis of migratory DFC phenotypes in integrin morphants at 80-90% epiboly**

| Marker                 | Injection stage | Morpholino              | mRNA               | $n_T$      | $n_{exp}$  | WT         | Mutant     | Absent     |
|------------------------|-----------------|-------------------------|--------------------|------------|------------|------------|------------|------------|
| cas                    | 1 to 4 cell     | Uninjected              | -                  | 124        | 5          | 77.9±6.9%  | 19.9±6.8%  | 2.2±2.5%   |
|                        |                 | 1.75 ng $\alpha V1miss$ | -                  | 51         | 2          | 75.7±6.1%  | 17.1±4.0%  | 7.1±10.1%  |
|                        |                 | None                    | 200 pg $m\alpha V$ | 19         | 2          | 63.3±4.7%  | 26.7±9.4%  | 16.1±8.6%  |
|                        |                 | 1.25 ng $\alpha V1$     | -                  | 69         | 4          | 17.6±6.3%  | 69.3±9.5%  | 13.2±7.3%  |
|                        |                 | 1.25 ng $\alpha V1$     | 200 pg $m\alpha V$ | 23         | 2          | 56.3±1.1%  | 43.7±1.1%  | 0%         |
|                        |                 | 1.75 ng $\alpha V2$     | -                  | 59         | 4          | 23.9±6.8%  | 67.9±9.3%  | 8.2±3.4%   |
|                        |                 | 1.75 ng $\alpha V2$     | 200 pg $m\alpha V$ | 19         | 2          | 52.2±11.0% | 42.8±18.1% | 5.0±7.1%   |
|                        |                 | 5.00 ng $\alpha VE110$  | -                  | 23         | 2          | 47.3±15.5% | 52.7±15.5% | 0%         |
|                        |                 | 0.75 ng $\beta 1b1$     | -                  | 40         | 3          | 21.1±18.3% | 72.2±18.0% | 6.7±8.2%   |
| 5.00 ng $\beta 1bE110$ | -               | 23                      | 2                  | 48.5±21.4% | 51.5±21.4% | 0%         |            |            |
| sox17                  | 1 to 4 cell     | Uninjected              | -                  | 53         | 3          | 68.8±7.5%  | 22.9±7.9%  | 8.3±4.8%   |
|                        |                 | 1.75 ng $\alpha V1miss$ | -                  | 17         | 2          | 70.8±4.2%  | 12.5±12.5% | 16.7±16.7% |
|                        |                 | 1.25 ng $\alpha V1$     | -                  | 27         | 2          | 19.2±4.2%  | 53.3±13.3% | 27.5±19.2% |
|                        |                 | 1.75 ng $\alpha V2$     | -                  | 28         | 2          | 32.5±7.5%  | 47.5±27.5% | 20.0±20.0% |
|                        |                 | 5.00 ng $\alpha VE110$  | -                  | 12         | 1          | 58.3%      | 33.3%      | 8.3%       |
|                        |                 | 0.75 ng $\beta 1b1$     | -                  | 18         | 2          | 37.0±8.4%  | 33.1±24.0% | 29.9±15.6% |
|                        |                 | 5.00 ng $\beta 1bE110$  | -                  | 21         | 1          | 38.1%      | 47.6%      | 14.3%      |
| ntl                    | 1 to 4 cell     | Uninjected              | -                  | 42         | 3          | 79.0±1.4%  | 16.5±3.9%  | 4.5±4.5%   |
|                        |                 | 1.75 ng $\alpha V1miss$ | -                  | 25         | 3          | 68.1±3.7%  | 8.3±8.3%   | 23.6±6.1%  |
|                        |                 | 1.25 ng $\alpha V1$     | -                  | 53         | 4          | 29.2±7.6%  | 60.9±2.0%  | 9.9±5.8%   |
|                        |                 | 5.00 ng $\alpha VE110$  | -                  | 46         | 2          | 36.9±0.1%  | 40.4±7.0%  | 22.7±6.9%  |
|                        |                 | 0.75 ng $\beta 1b1$     | -                  | 31         | 3          | 34.2±4.6%  | 58.6±3.8%  | 8.3±8.3%   |
|                        |                 | 5.00 ng $\beta 1bE110$  | -                  | 29         | 2          | 41.4±0.2%  | 58.6±0.2%  | 0%         |
| cas                    | 512-1000 cell   | Uninjected              | -                  | 63         | 2          | 80.6±10.3% | 11.1±1.5%  | 8.3±11.8%  |
|                        |                 | 2.50 ng $\alpha V1miss$ | -                  | 47         | 3          | 75.5±3.6%  | 19.2±7.1%  | 5.3±3.6%   |
|                        |                 | 1.25 ng $\alpha V1$     | -                  | 48         | 3          | 36.8±5.3%  | 41.5±8.8%  | 21.7±3.8%  |
|                        |                 | 1.75 ng $\alpha V2$     | -                  | 12         | 1          | 41.7%      | 41.7%      | 16.7%      |
|                        |                 | 0.75 ng $\beta 1b1$     | -                  | 39         | 3          | 36.1±9.0%  | 42.6±6.0%  | 21.3±14.7% |
|                        |                 | 5.00 ng $\beta 1bE110$  | -                  | 25         | 2          | 23.4±7.3%  | 64.0±0.5%  | 12.7±7.8%  |
