# Supplementary material for: Integrin αV is necessary for gastrulation movements that regulate vertebrate body asymmetry
Source: Oxford University Press journal article supplement (doi:10.1242/dev.045310), 2010-09-16
Supplement: dev045310tables5.pdf [file dev045310tables5.pdf]

**Table S5. Low dose morpholino co-injections and analysis of migratory DFC phenotypes in integrin morphants at 80-90% epiboly**

| Marker       | Injection stage | Morpholino                                      | $n_T$ | $n_{exp}$ | WT         | Mutant    | Absent   |
|--------------|-----------------|-------------------------------------------------|-------|-----------|------------|-----------|----------|
| <i>sox17</i> | 1 to 4 cell     | 0.41 ng $\alpha V1$                             | 227   | 4         | 84.9±3.7%  | 13.1±4.7% | 2.0±1.1% |
|              |                 | 1.5 ng $\beta 1bEI10$                           | 156   | 4         | 83.9±2.5%  | 14.8±2.0% | 1.3±1.3% |
|              |                 | 0.41 ng $\alpha V1miss$ + 1.5 ng $\beta 1bEI10$ | 223   | 3         | 81.4± 5.0% | 18.1±5.2% | 0.5±0.5% |
|              |                 | 0.41 ng $\alpha V1$ + 1.5 ng $\beta 1bEI10$     | 286   | 4         | 44.9±2.7%  | 54.3±3.2% | 0.8±0.8% |

Location of DFCs was examined on live *Tg[sox17:eGFP]* embryos. Phenotypic classification of DFCs was as follows: WT, ovoid DFC marker expression domain; Mutant, a linear DFC marker expression domain with occasional gaps; Absent, no visible DFC marker expression. Data were expressed as the number of embryos with specific marker/organ location divided by the total number of embryos used per experiment multiplied by 100 (%) ± s.e.m.  $n_{exp}$ =number of experimental repeats.  $n_T$ =total number of embryos.
